# Supplementary material for: Chitosan-S-triazinyl-bis(2-aminomethylpyridine) and Chitosan-S-triazinyl-bis(8-oxyquinoline) Derivatives: New Reagents for Silver Nanoparticle Preparation and Their Effect of Antimicrobial Evaluation
Source: Hindawi journal article supplement (doi:10.1155/2020/9590120), 2020-06-25
Supplement: f1 [file 9590120.f1.pdf]

**Supporting Information**  
**Chitosan-*s*-triazinyl-*bis*(2-aminomethylpyridine) and chitosan-*s*-  
triazinyl-*bis*(8-oxyquinoline) derivatives: **New reagents for silver  
nanoparticles preparation and their antimicrobial evaluation****

Kholood A. Dahlous, Hessa H. Al-Rasheed, Essam N. Sholkamy, Sameh M. Osman,  
Omar H. Abd-Elkader, Ayman El-Faham\*

**Table of Contents**

- Figure S1:** Ninhydrine test: A) **Chitosan**; B) **Modified** chitosan; Ch-TC2
- Figure S2:** Preparation of AgNPs using modified chitosan Ch-TQ.
- Figure S3:** UV-Vis spectra of silver nanoparticles solutions of Ch-TQ-AgNPs and Ch-TAMPy-AgNPs.
- Figure S4A:** Energy dispersive X-ray spectra (EDX) of the prepared silver nanoparticles from Ch-TQ.
- Figure S4B:** Energy dispersive X-ray spectra (EDX) of the prepared silver nanoparticles from Ch-TAMPy.
- Figure S5A:** AgNPs from Ch-TQ and their particles diagram.
- Figure S5B:** AgNPs from Ch-TAMPY and their particles diagram.
- Table S1:** Information derived from TG curves for thermal degradation of copolymers
- Table S2:**  $2\theta$  and d spacing for AgNPs calculated and observed by Ch-TQ and Ch-TAMPy.
- Table S3:** Lattice parameters, unit cell volume and space group for AgNPs by Ch-TQ and Ch-TAMPy.
- Table S4:** Average grain size (D), dislocation density ( $\delta$ ), and the strain ( $\epsilon$ ) of the AgNPs.

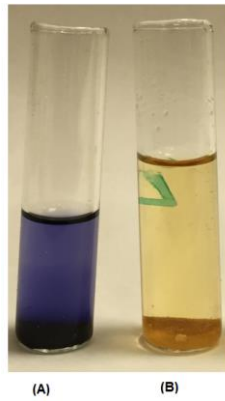

**Figure S1:** Ninhydrine test: A) **Chitosan**; B) **Modified** chitosan; Ch-TC2

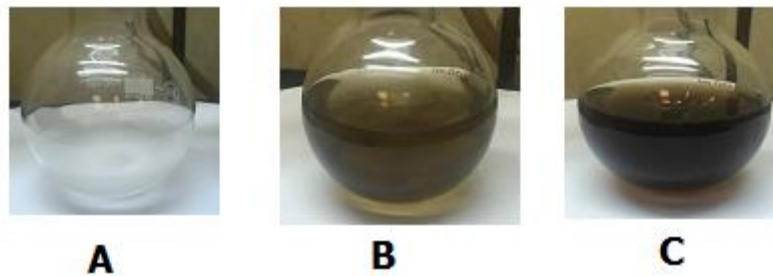

**Figure S2:** Preparation of AgNPs using modified chitosan Ch-TQ.

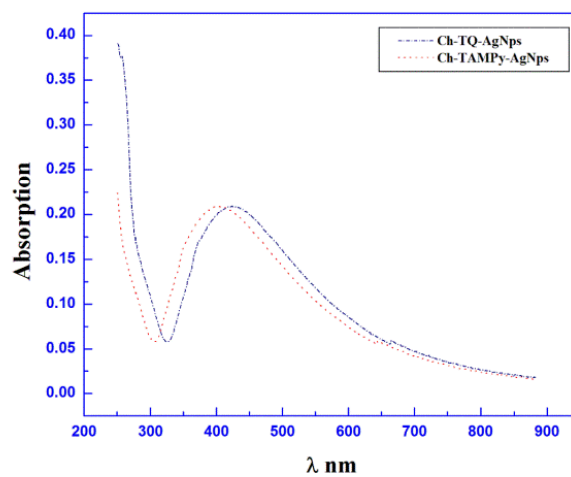

**Figure S3:** UV-Vis spectra of silver nanoparticles solutions of Ch-TQ-AgNPs and Ch-TAMPy-AgNPs.

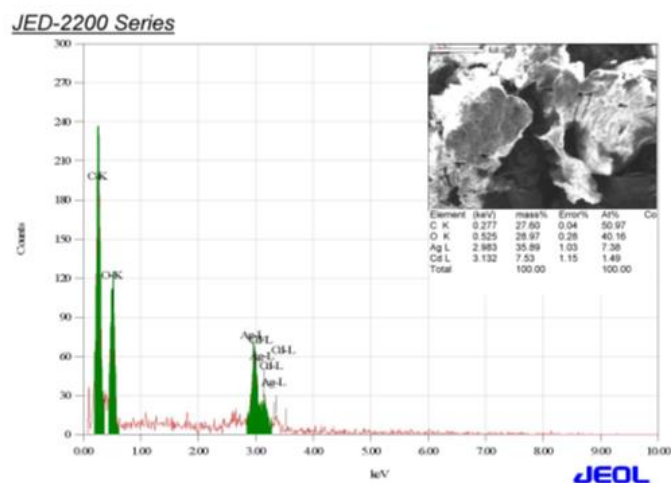

**Figure S4A:** Energy dispersive X-ray spectra (EDX) of the prepared silver nanoparticles from Ch-TQ.

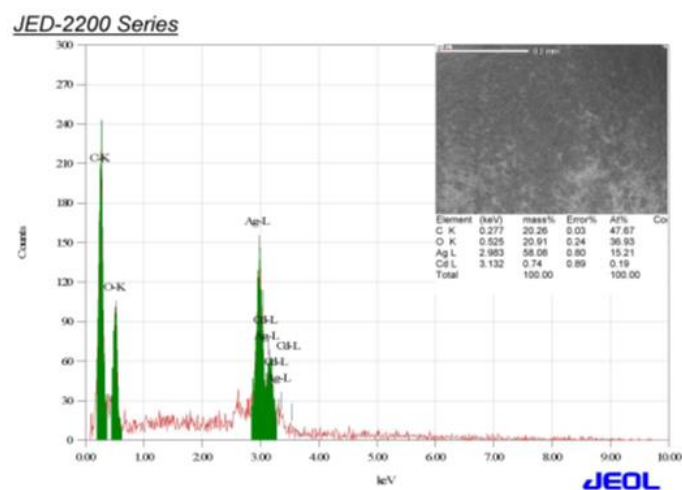

**Figure S4B:** Energy dispersive X-ray spectra (EDX) of the prepared silver nanoparticles from Ch-TAMPy.

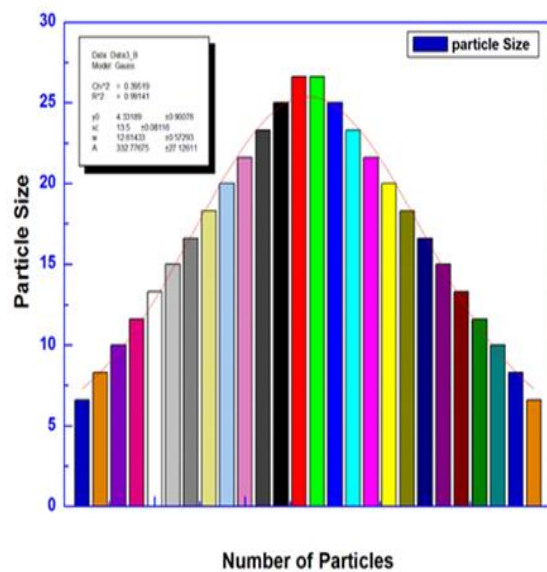

**Figure S5A:** AgNPs from Ch-TQ and their particles diagram.

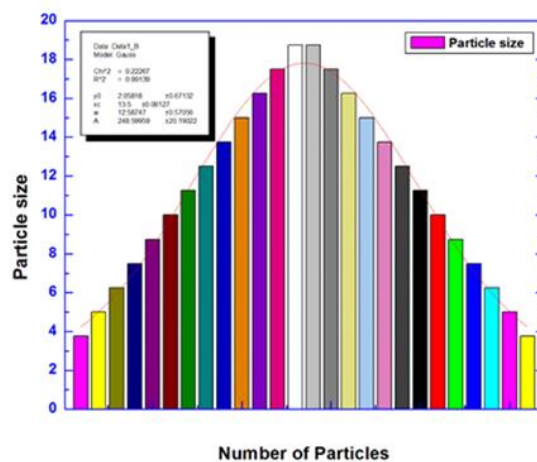

**Figure S5B:** AgNPs from Ch-TAMPY and their particles diagram.

**Table S1:** Information derived from TG curves for thermal degradation of copolymers

| Cpd. No     | Stage | $T_{range}$ (°C) | Mass loss (%) | DTG (°C) | $T_{onset}$ (°C) | $T_{50}$ (°C) | Residue* (%) |
|-------------|-------|------------------|---------------|----------|------------------|---------------|--------------|
| Ch; 2       | I     | 36 – 167         | 7.7           | 96       | 274              | 390           | 25.6         |
|             | II    | 290 - 450        | 49.3          | 355      |                  |               |              |
| Ch-TQ; 5    | I     | 34 – 167         | 7.8           | 97       | 274              | 389           | 32.1         |
|             | II    | 287 - 449        | 49.3          | 356      |                  |               |              |
| Ch-TAMPy; 6 | I     | 23 – 187         | 9.5           | 92       | 234              | 415           | 29.9         |
|             | II    | 255 - 425        | 39.8          | 315      |                  |               |              |

\*Calculated at 800°C

**Table S2:**  $2\theta$  and d spacing for AgNPs calculated and observed by Ch-TQ and Ch-TAMPy

| h               | k | l | $2\theta$ (Observed) | $2\theta$ (Calculated) | Difference | d spacing |
|-----------------|---|---|----------------------|------------------------|------------|-----------|
| <b>Ch-TQ.</b>   |   |   |                      |                        |            |           |
| 1               | 1 | 1 | 37.3800              | 37.7573                | 0.3773     | 2.3776    |
| 0               | 0 | 2 | 43.6300              | 43.8781                | 0.2481     | 2.0591    |
| 0               | 2 | 2 | 63.9200              | 63.792                 | 0.1280     | 1.4560    |
| 1               | 1 | 3 | 77.0700              | 76.570                 | 0.4992     | 1.2417    |
| <b>Ch-TAMPy</b> |   |   |                      |                        |            |           |
| 1               | 1 | 1 | 37.490               | 37.928                 | -0.438     | 2.3990    |
| 0               | 0 | 2 | 43.750               | 44.079                 | -0.329     | 2.0692    |
| 0               | 2 | 2 | 64.140               | 64.102                 | 0.038      | 1.4528    |
| 1               | 1 | 3 | 77.070               | 76.964                 | 0.106      | 1.2375    |

**Table S3:** Lattice parameters, unit cell volume and space group for AgNPs by Ch-TQ and Ch-TAMPy

| Cpd      | a      | b      | c      | alpha | beta  | gamma | Volume | Space Group |
|----------|--------|--------|--------|-------|-------|-------|--------|-------------|
| Ch-TQ    | 4.1269 | 4.1269 | 4.1269 | 90.00 | 90.00 | 90.00 | 70.287 | FM3M        |
| Ch-TAMPy | 4.1090 | 4.1090 | 4.1090 | 90.00 | 90.00 | 90.00 | 70.050 | FM3M        |

**Table S4:** Average grain size (D), dislocation density ( $\delta$ ), and the strain ( $\epsilon$ ) of the AgNPs.

| Cpd.     | D nm  | $\delta$ lines/ nm <sup>2</sup> | $\epsilon$ |
|----------|-------|---------------------------------|------------|
| Ch-TQ.   | 40.70 | 6.03 x 10 <sup>-4</sup>         | 0.028      |
| Ch-TAMPy | 44.68 | 5.009 x 10 <sup>-4</sup>        | 0.0025     |

The average grain size (D), dislocation density ( $\delta$ ), and the strain ( $\epsilon$ ) of the AgNPs were calculated using the following equations:

$$D = \frac{0.9\lambda}{\beta \cos \theta} \quad (1)$$

$$\delta = \frac{1}{D^2} \quad (2)$$

$$\epsilon = \frac{\beta \cos \theta}{4} \quad (3)$$
